# Supplementary material
Source: PubMed Central journal article supplement (PMC6207315)
Supplement: ahdb-11-310-s1.pdf [file ahdb-11-310-s1.pdf]

## Supplemental Materials

### **Estimating the Real-World Cost of Diabetes Mellitus in the United States During an 8-Year Period Using 2 Different Cost Methodologies**

Vincent J. Willey, PharmD; Sheldon Kong, PhD; Bingcao Wu; Amit Raval, PhD; Todd Hobbs, MD; Andrea Windsheimer; Gaurav Deshpande, MS, PhD; Ozgur Tunceli; Brian Sakurada; Jonathan R. Bouchard, MS, RPh

This Appendix has not been edited and is provided as supplemental materials for this article, which was published in *American Health & Drug Benefits* in September 2018.

**Supplemental Table 1. Comorbid conditions and complications of T1DM and T2DM in the US, 2007 - 2014**

|                                            |          | Cohorts |        |        |        |        |        |        |        |
|--------------------------------------------|----------|---------|--------|--------|--------|--------|--------|--------|--------|
|                                            |          | 2007    | 2008   | 2009   | 2010   | 2011   | 2012   | 2013   | 2014   |
| <b>Type 1 Diabetes Mellitus</b>            |          |         |        |        |        |        |        |        |        |
| Sample size of T1DM, n                     |          | 23,073  | 24,683 | 26,228 | 26,164 | 25,876 | 24,986 | 23,881 | 21,176 |
| DCI                                        | T1DM     | 2.3     | 2.4    | 2.4    | 2.4    | 2.5    | 2.6    | 2.6    | 2.5    |
|                                            | Controls | 0.4     | 0.4    | 0.4    | 0.4    | 0.4    | 0.4    | 0.4    | 0.5    |
| ADCSI                                      | T1DM     | 2.1     | 2.1    | 2.1    | 2.1    | 2.1    | 2.2    | 2.2    | 2.1    |
|                                            | Controls | 0.3     | 0.4    | 0.4    | 0.4    | 0.4    | 0.4    | 0.4    | 0.4    |
| <b>Comorbid Conditions of T1DM</b>         |          |         |        |        |        |        |        |        |        |
| Hypertension                               | T1DM     | 55.3%   | 57.4%  | 58.3%  | 59.5%  | 60.0%  | 63.6%  | 62.7%  | 61.8%  |
|                                            | Controls | 28.1%   | 29.5%  | 29.6%  | 29.9%  | 30.5%  | 32.7%  | 32.7%  | 32.4%  |
| Dyslipidemia                               | T1DM     | 54.0%   | 57.4%  | 59.2%  | 60.9%  | 61.1%  | 65.2%  | 65.3%  | 65.5%  |
|                                            | Controls | 27.8%   | 29.6%  | 30.3%  | 30.8%  | 32.1%  | 33.6%  | 32.9%  | 32.7%  |
| <b>Microvascular Complications of T1DM</b> |          |         |        |        |        |        |        |        |        |
| Retinopathy                                | T1DM     | 34.2%   | 33.4%  | 32.9%  | 32.3%  | 31.9%  | 33.1%  | 32.3%  | 32.1%  |
|                                            | Controls | 1.4%    | 1.5%   | 1.6%   | 1.6%   | 1.7%   | 1.9%   | 2.0%   | 2.2%   |
| Nephropathy                                | T1DM     | 19.4%   | 20.3%  | 20.5%  | 20.4%  | 20.9%  | 22.2%  | 22.0%  | 22.0%  |
|                                            | Controls | 1.9%    | 2.1%   | 2.2%   | 2.3%   | 2.5%   | 3.0%   | 3.1%   | 3.3%   |
| Neuropathy                                 | T1DM     | 28.6%   | 29.0%  | 29.5%  | 29.5%  | 30.2%  | 31.9%  | 32.2%  | 32.4%  |
|                                            | Controls | 3.5%    | 3.8%   | 3.9%   | 4.0%   | 4.0%   | 4.6%   | 4.5%   | 4.7%   |
| <b>Macrovascular Complications of T1DM</b> |          |         |        |        |        |        |        |        |        |
| IHD                                        | T1DM     | 22.6%   | 23.1%  | 23.0%  | 22.4%  | 22.3%  | 23.8%  | 22.6%  | 21.4%  |

|                                            |                        |         |         |         |         |         |         |         |         |
|--------------------------------------------|------------------------|---------|---------|---------|---------|---------|---------|---------|---------|
|                                            | Controls               | 6.9%    | 7.0%    | 6.9%    | 6.9%    | 6.9%    | 7.5%    | 7.2%    | 7.4%    |
| PVD                                        | T1DM                   | 16.3%   | 16.8%   | 16.8%   | 16.8%   | 17.0%   | 18.2%   | 17.7%   | 16.5%   |
|                                            | Controls               | 1.8%    | 2.0%    | 2.0%    | 2.0%    | 2.0%    | 2.4%    | 2.1%    | 2.1%    |
| CVD                                        | T1DM                   | 10.1%   | 10.3%   | 10.2%   | 10.3%   | 10.5%   | 11.0%   | 10.7%   | 10.2%   |
|                                            | Controls               | 3.4%    | 3.8%    | 4.0%    | 4.0%    | 4.1%    | 4.5%    | 4.2%    | 4.1%    |
| <b>Type 2 Diabetes Mellitus</b>            |                        |         |         |         |         |         |         |         |         |
|                                            | Sample size of T2DM, n | 346,486 | 390,055 | 400,625 | 400,804 | 410,234 | 406,655 | 397,693 | 373,858 |
| DCI                                        | T2DM                   | 1.9     | 2.0     | 2.0     | 2.1     | 2.1     | 2.1     | 2.2     | 2.2     |
|                                            | Controls               | 0.5     | 0.5     | 0.5     | 0.5     | 0.5     | 0.6     | 0.6     | 0.6     |
| ADCSI                                      | T2DM                   | 1.2     | 1.3     | 1.3     | 1.3     | 1.3     | 1.4     | 1.4     | 1.5     |
|                                            | Controls               | 0.5     | 0.5     | 0.5     | 0.5     | 0.5     | 0.6     | 0.6     | 0.6     |
| <b>Comorbid Conditions of T2DM</b>         |                        |         |         |         |         |         |         |         |         |
| Hypertension                               | T2DM                   | 72.8%   | 74.8%   | 75.8%   | 76.7%   | 77.2%   | 80.3%   | 80.5%   | 80.9%   |
|                                            | Controls               | 37.1%   | 38.6%   | 39.2%   | 40.0%   | 40.9%   | 43.0%   | 43.5%   | 44.2%   |
| Dyslipidemia                               | T2DM                   | 69.4%   | 72.0%   | 73.4%   | 74.4%   | 74.9%   | 78.5%   | 78.6%   | 78.9%   |
|                                            | Controls               | 37.1%   | 38.7%   | 39.3%   | 40.4%   | 41.1%   | 43.4%   | 43.3%   | 43.7%   |
| <b>Microvascular Complications of T2DM</b> |                        |         |         |         |         |         |         |         |         |
| Retinopathy                                | T2DM                   | 13.6%   | 13.5%   | 13.1%   | 13.2%   | 12.8%   | 13.4%   | 13.3%   | 13.2%   |
|                                            | Controls               | 1.9%    | 2.0%    | 2.1%    | 2.3%    | 2.3%    | 2.6%    | 2.7%    | 2.8%    |
| Nephropathy                                | T2DM                   | 9.8%    | 10.9%   | 11.2%   | 11.8%   | 12.3%   | 13.4%   | 14.2%   | 15.0%   |
|                                            | Controls               | 2.4%    | 2.8%    | 3.0%    | 3.3%    | 3.6%    | 4.0%    | 4.3%    | 4.6%    |
| Neuropathy                                 | T2DM                   | 16.3%   | 17.0%   | 17.2%   | 17.5%   | 17.8%   | 19.0%   | 19.9%   | 20.8%   |
|                                            | Controls               | 4.5%    | 4.8%    | 4.8%    | 5.0%    | 5.1%    | 5.5%    | 5.7%    | 5.9%    |
| <b>Macrovascular Complications of T2DM</b> |                        |         |         |         |         |         |         |         |         |
| IHD                                        | T2DM                   | 21.2%   | 21.5%   | 21.2%   | 21.1%   | 21.0%   | 21.7%   | 21.7%   | 21.4%   |
|                                            | Controls               | 9.8%    | 10.1%   | 10.0%   | 10.0%   | 10.0%   | 10.6%   | 10.8%   | 10.7%   |
| PVD                                        | T2DM                   | 9.6%    | 10.0%   | 10.0%   | 10.3%   | 10.4%   | 10.9%   | 10.9%   | 10.9%   |
|                                            | Controls               | 2.5%    | 2.7%    | 2.8%    | 2.8%    | 2.9%    | 3.0%    | 3.0%    | 3.1%    |
| CVD                                        | T2DM                   | 8.7%    | 9.4%    | 9.5%    | 9.7%    | 9.9%    | 10.3%   | 10.4%   | 10.4%   |
|                                            | Controls               | 4.9%    | 5.2%    | 5.3%    | 5.5%    | 5.6%    | 6.0%    | 6.1%    | 6.1%    |

ADCSI: Adapted Diabetes Complications Severity Index; CVD: cerebrovascular disease; DCI: Deyo-Charlson Comorbidity Index; IHD: ischemic heart disease; PVD: peripheral vascular disease; T1DM: type 1 diabetes mellitus; T2DM: type 2 diabetes mellitus.

**Supplemental Table 2. Healthcare resource utilization and HEDIS metrics of T1DM and T2DM in the US, 2007 - 2014**

|                                 | Cohorts  |         |         |         |         |         |         |         |       |
|---------------------------------|----------|---------|---------|---------|---------|---------|---------|---------|-------|
|                                 | 2007     | 2008    | 2009    | 2010    | 2011    | 2012    | 2013    | 2014    |       |
| <b>Type 1 Diabetes Mellitus</b> |          |         |         |         |         |         |         |         |       |
| Sample size of T1DM, n          | 23,073   | 24,683  | 26,228  | 26,164  | 25,876  | 24,986  | 23,881  | 21,176  |       |
| All-cause hospitalization       | T1DM     | 23.7%   | 23.0%   | 22.6%   | 22.4%   | 21.7%   | 22.5%   | 21.7%   | 20.8% |
|                                 | Controls | 8.4%    | 8.0%    | 8.1%    | 7.9%    | 7.6%    | 8.0%    | 7.6%    | 7.4%  |
| All-cause ER visit              | T1DM     | 23.7%   | 23.2%   | 23.4%   | 23.4%   | 23.3%   | 24.3%   | 23.9%   | 24.4% |
|                                 | Controls | 12.1%   | 12.4%   | 12.5%   | 12.5%   | 12.1%   | 13.6%   | 12.7%   | 13.0% |
| T1DM-related hospitalization    |          | 22.0%   | 21.3%   | 21.1%   | 21.0%   | 20.7%   | 21.5%   | 20.7%   | 19.8% |
| T1DM-related ER visit           |          | 18.2%   | 17.6%   | 18.0%   | 18.4%   | 18.3%   | 19.1%   | 19.2%   | 20.0% |
| HEDIS metrics                   |          |         |         |         |         |         |         |         |       |
| ≥1 HbA1c test                   |          | 72.4%   | 73.6%   | 75.8%   | 76.9%   | 77.2%   | 79.5%   | 80.8%   | 79.7% |
| ≥1 eye exam                     |          | 44.3%   | 44.4%   | 44.1%   | 43.9%   | 46.4%   | 46.2%   | 46.8%   | 46.5% |
| ≥1 LDL test                     |          | 59.7%   | 60.4%   | 62.0%   | 63.1%   | 62.7%   | 65.0%   | 65.9%   | 64.4% |
| ≥1 nephropathy test             |          | 41.9%   | 44.0%   | 46.1%   | 46.5%   | 47.2%   | 46.6%   | 48.2%   | 48.4% |
| <b>Type 2 Diabetes Mellitus</b> |          |         |         |         |         |         |         |         |       |
| Sample size of T2DM, n          | 346,486  | 390,055 | 400,625 | 400,804 | 410,234 | 406,655 | 397,693 | 373,858 |       |
| All-cause hospitalization       | T2DM     | 17.0%   | 17.0%   | 16.5%   | 16.2%   | 15.9%   | 16.1%   | 15.9%   | 15.8% |
|                                 | Controls | 9.5%    | 9.6%    | 9.4%    | 9.2%    | 9.1%    | 9.3%    | 9.2%    | 9.1%  |
| All-cause ER visit              | T2DM     | 17.7%   | 17.6%   | 17.9%   | 18.0%   | 18.5%   | 19.4%   | 19.5%   | 20.1% |
|                                 | Controls | 11.9%   | 12.0%   | 12.0%   | 12.2%   | 12.5%   | 13.3%   | 13.2%   | 13.8% |
| T2DM-related hospitalization    |          | 13.9%   | 13.8%   | 13.5%   | 13.2%   | 13.2%   | 13.3%   | 13.2%   | 13.1% |
| T2DM-related ER visit           |          | 10.4%   | 10.3%   | 10.7%   | 11.0%   | 11.5%   | 12.0%   | 12.2%   | 12.9% |

|                     |       |       |       |       |       |       |       |       |  |
|---------------------|-------|-------|-------|-------|-------|-------|-------|-------|--|
| HEDIS metrics       |       |       |       |       |       |       |       |       |  |
| ≥1 HbA1c test       | 67.5% | 67.1% | 68.8% | 70.0% | 70.1% | 72.5% | 73.2% | 71.3% |  |
| ≥1 eye exam         | 36.0% | 36.7% | 36.9% | 36.7% | 37.9% | 38.0% | 38.5% | 38.0% |  |
| ≥1 LDL test         | 63.6% | 63.2% | 64.6% | 65.0% | 64.9% | 66.9% | 67.4% | 64.6% |  |
| ≥1 nephropathy test | 30.5% | 31.9% | 34.0% | 34.4% | 35.3% | 35.6% | 36.6% | 36.3% |  |

ER: emergency room; HbA1c: hemoglobin A1c; HEDIS: Healthcare Effectiveness Data and Information Set; LDL: low-density lipoprotein; T1DM: type 1 diabetes mellitus; T2DM: type 2 diabetes mellitus.

**Supplemental Table 3. Mean healthcare costs due to T1DM and T2DM estimated by 2 different cost estimation methods in the US, 2007 - 2014**

|                                 |                                             | Adjusted Annual Cost Estimates |                 |                 |                 |                 |                 |                 |                 |
|---------------------------------|---------------------------------------------|--------------------------------|-----------------|-----------------|-----------------|-----------------|-----------------|-----------------|-----------------|
|                                 |                                             | 2007                           | 2008            | 2009            | 2010            | 2011            | 2012            | 2013            | 2014            |
| <b>Type 1 Diabetes Mellitus</b> |                                             |                                |                 |                 |                 |                 |                 |                 |                 |
| Sample size of T1DM, n          |                                             | 23,073                         | 24,683          | 26,228          | 26,164          | 25,876          | 24,986          | 23,881          | 21,176          |
| Method 1                        | <b>Total all-cause healthcare costs</b>     | <b>\$23,261</b>                | <b>\$22,756</b> | <b>\$24,437</b> | <b>\$24,345</b> | <b>\$25,251</b> | <b>\$24,347</b> | <b>\$25,736</b> | <b>\$25,855</b> |
|                                 | T1DM cohort                                 |                                |                 |                 |                 |                 |                 |                 |                 |
|                                 | Hospitalizations                            | \$5,427                        | \$5,677         | \$6,486         | \$6,248         | \$5,686         | \$5,452         | \$5,396         | \$4,767         |
|                                 | Emergency room visits                       | \$581                          | \$575           | \$585           | \$591           | \$663           | \$616           | \$683           | \$682           |
|                                 | Outpatient encounters                       | \$11,005                       | \$10,263        | \$10,680        | \$10,677        | \$11,826        | \$11,158        | \$12,170        | \$11,946        |
|                                 | Skilled nursing facility                    | \$222                          | \$308           | \$328           | \$356           | \$274           | \$359           | \$307           | \$290           |
|                                 | Pharmacy prescriptions                      | \$6,026                        | \$5,932         | \$6,358         | \$6,473         | \$6,802         | \$6,762         | \$7,180         | \$8,169         |
|                                 | <b>Total all-cause healthcare costs</b>     | <b>\$6,596</b>                 | <b>\$8,610</b>  | <b>\$8,730</b>  | <b>\$8,575</b>  | <b>\$9,925</b>  | <b>\$8,936</b>  | <b>\$9,070</b>  | <b>\$8,389</b>  |
|                                 | Non-DM Control                              |                                |                 |                 |                 |                 |                 |                 |                 |
|                                 | Hospitalizations                            | \$1,096                        | \$1,642         | \$1,478         | \$1,544         | \$1,840         | \$1,781         | \$1,582         | \$1,453         |
|                                 | Emergency room visits                       | \$215                          | \$265           | \$250           | \$282           | \$352           | \$348           | \$388           | \$381           |
|                                 | Outpatient encounters                       | \$3,597                        | \$4,480         | \$4,821         | \$4,607         | \$5,436         | \$4,892         | \$4,945         | \$4,826         |
|                                 | Skilled nursing facility                    | \$31                           | \$128           | \$122           | \$113           | \$102           | \$210           | \$61            | \$71            |
|                                 | Pharmacy prescriptions                      | \$1,658                        | \$2,096         | \$2,059         | \$2,030         | \$2,196         | \$1,704         | \$2,095         | \$1,657         |
|                                 | <b>Total all-cause healthcare costs</b>     | <b>\$16,665</b>                | <b>\$14,146</b> | <b>\$15,707</b> | <b>\$15,770</b> | <b>\$15,325</b> | <b>\$15,412</b> | <b>\$16,666</b> | <b>\$17,466</b> |
| Difference                      |                                             |                                |                 |                 |                 |                 |                 |                 |                 |
| Hospitalizations                | \$4,332                                     | \$4,036                        | \$5,008         | \$4,705         | \$3,847         | \$3,670         | \$3,814         | \$3,314         |                 |
| Emergency room visits           | \$366                                       | \$311                          | \$335           | \$309           | \$311           | \$269           | \$295           | \$301           |                 |
| Outpatient encounters           | \$7,408                                     | \$5,783                        | \$5,859         | \$6,070         | \$6,390         | \$6,265         | \$7,225         | \$7,120         |                 |
| Skilled nursing facility        | \$192                                       | \$180                          | \$206           | \$243           | \$172           | \$149           | \$246           | \$219           |                 |
| Pharmacy prescriptions          | \$4,368                                     | \$3,836                        | \$4,299         | \$4,443         | \$4,605         | \$5,059         | \$5,085         | \$6,512         |                 |
| Method 2                        | <b>Total direct T1DM attributable costs</b> | <b>\$6,115</b>                 | <b>\$6,087</b>  | <b>\$6,756</b>  | <b>\$7,027</b>  | <b>\$7,732</b>  | <b>\$7,837</b>  | <b>\$8,215</b>  | <b>\$9,331</b>  |
|                                 | Hospitalizations                            | \$188                          | \$177           | \$191           | \$208           | \$194           | \$207           | \$198           | \$180           |
|                                 | Emergency room visits                       | \$373                          | \$386           | \$394           | \$406           | \$448           | \$416           | \$474           | \$498           |
|                                 | Outpatient encounters                       | \$3,493                        | \$3,324         | \$3,657         | \$3,735         | \$4,227         | \$4,073         | \$3,985         | \$4,342         |
|                                 | Skilled nursing facility                    | \$127                          | \$164           | \$198           | \$211           | \$148           | \$225           | \$153           | \$167           |
|                                 | Pharmacy prescriptions                      | \$1,934                        | \$2,037         | \$2,315         | \$2,467         | \$2,715         | \$2,916         | \$3,407         | \$4,144         |
| <b>Type 2 Diabetes Mellitus</b> |                                             |                                |                 |                 |                 |                 |                 |                 |                 |
| Sample size of T2DM, n          |                                             | 346,486                        | 390,055         | 400,625         | 400,804         | 410,234         | 406,655         | 397,693         | 373,858         |

|                          |                                             |                                         |                 |                 |                 |                 |                 |                 |                 |                 |
|--------------------------|---------------------------------------------|-----------------------------------------|-----------------|-----------------|-----------------|-----------------|-----------------|-----------------|-----------------|-----------------|
| Method 1                 | T2DM Cohort                                 | <b>Total all-cause healthcare costs</b> | <b>\$14,514</b> | <b>\$14,184</b> | <b>\$15,145</b> | <b>\$15,439</b> | <b>\$15,616</b> | <b>\$14,584</b> | <b>\$15,454</b> | <b>\$15,716</b> |
|                          |                                             | Hospitalizations                        | \$3,205         | \$3,132         | \$3,456         | \$3,364         | \$3,128         | \$3,014         | \$3,153         | \$2,967         |
|                          |                                             | Emergency room visits                   | \$355           | \$361           | \$385           | \$396           | \$448           | \$438           | \$466           | \$477           |
|                          |                                             | Outpatient encounters                   | \$6,661         | \$6,563         | \$6,914         | \$7,115         | \$7,376         | \$6,949         | \$7,379         | \$7,407         |
|                          |                                             | Skilled nursing facility                | \$118           | \$168           | \$196           | \$194           | \$197           | \$201           | \$218           | \$210           |
|                          | Pharmacy prescriptions                      | \$4,176                                 | \$3,960         | \$4,193         | \$4,370         | \$4,467         | \$3,982         | \$4,238         | \$4,654         |                 |
|                          | Non-DM Control                              | <b>Total all-cause healthcare costs</b> | <b>\$7,833</b>  | <b>\$8,296</b>  | <b>\$8,912</b>  | <b>\$8,963</b>  | <b>\$8,915</b>  | <b>\$8,343</b>  | <b>\$8,702</b>  | <b>\$8,594</b>  |
|                          |                                             | Hospitalizations                        | \$1,358         | \$1,393         | \$1,695         | \$1,644         | \$1,441         | \$1,440         | \$1,564         | \$1,437         |
|                          |                                             | Emergency room visits                   | \$217           | \$244           | \$251           | \$266           | \$289           | \$287           | \$308           | \$333           |
|                          |                                             | Outpatient encounters                   | \$4,201         | \$4,497         | \$4,752         | \$4,873         | \$5,002         | \$4,706         | \$4,916         | \$4,835         |
| Skilled nursing facility |                                             | \$49                                    | \$103           | \$118           | \$124           | \$110           | \$124           | \$118           | \$125           |                 |
| Pharmacy prescriptions   | \$2,007                                     | \$2,059                                 | \$2,096         | \$2,056         | \$2,072         | \$1,787         | \$1,795         | \$1,865         |                 |                 |
| Difference               | <b>Total all-cause healthcare costs</b>     | <b>\$6,681</b>                          | <b>\$5,888</b>  | <b>\$6,233</b>  | <b>\$6,475</b>  | <b>\$6,702</b>  | <b>\$6,241</b>  | <b>\$6,752</b>  | <b>\$7,122</b>  |                 |
|                          | Hospitalizations                            | \$1,846                                 | \$1,739         | \$1,762         | \$1,719         | \$1,687         | \$1,574         | \$1,589         | \$1,531         |                 |
|                          | Emergency room visits                       | \$138                                   | \$117           | \$134           | \$130           | \$158           | \$150           | \$158           | \$144           |                 |
|                          | Outpatient encounters                       | \$2,460                                 | \$2,066         | \$2,162         | \$2,242         | \$2,375         | \$2,243         | \$2,463         | \$2,572         |                 |
|                          | Skilled nursing facility                    | \$69                                    | \$65            | \$79            | \$70            | \$87            | \$77            | \$100           | \$85            |                 |
| Pharmacy prescriptions   | \$2,168                                     | \$1,901                                 | \$2,097         | \$2,314         | \$2,395         | \$2,196         | \$2,443         | \$2,790         |                 |                 |
| Method 2                 | <b>Total direct T2DM attributable costs</b> | <b>\$2,955</b>                          | <b>\$3,112</b>  | <b>\$3,485</b>  | <b>\$3,688</b>  | <b>\$4,082</b>  | <b>\$3,962</b>  | <b>\$4,334</b>  | <b>\$4,663</b>  |                 |
|                          | Hospitalizations                            | \$102                                   | \$105           | \$113           | \$120           | \$118           | \$120           | \$123           | \$127           |                 |
|                          | Emergency room visits                       | \$181                                   | \$201           | \$219           | \$231           | \$275           | \$267           | \$287           | \$307           |                 |
|                          | Outpatient encounters                       | \$1,570                                 | \$1,622         | \$1,816         | \$1,893         | \$2,137         | \$2,093         | \$2,270         | \$2,271         |                 |
|                          | Skilled nursing facility                    | \$55                                    | \$92            | \$105           | \$102           | \$104           | \$110           | \$112           | \$108           |                 |
| Pharmacy prescriptions   | \$1,046                                     | \$1,092                                 | \$1,232         | \$1,342         | \$1,448         | \$1,371         | \$1,541         | \$1,850         |                 |                 |

T1DM: type 1 diabetes mellitus; T2DM: type 2 diabetes mellitus

**Supplemental Figure 1. Use of non-insulin antidiabetic medications among T2DM in the US, 2007-2014**

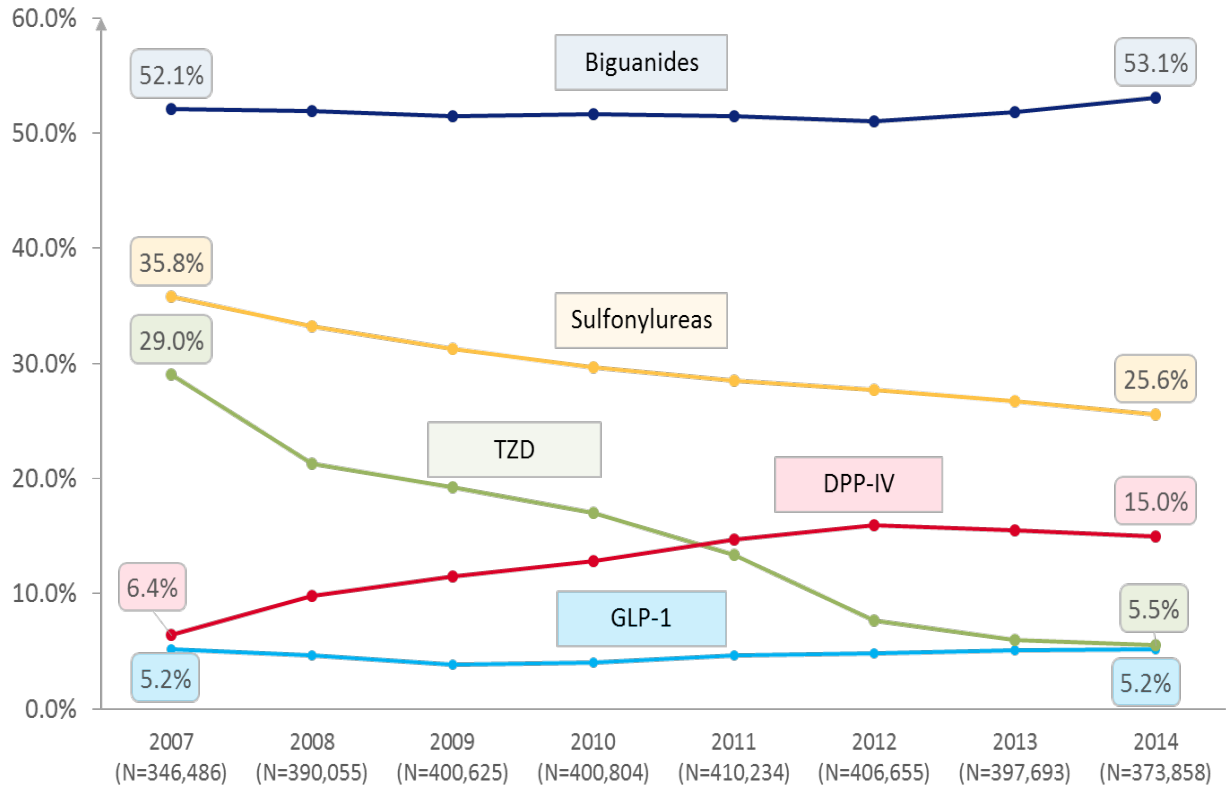

DPP-IV: Dipeptidyl peptidase inhibitors; GLP-1: Glucagon-like peptide-1 Receptor Agonists; TZD: Thiazolidinediones; T2DM: type 2 diabetes mellitus.

**Supplemental Figure 2. Use of insulin among T2DM in the US, 2007-2014**

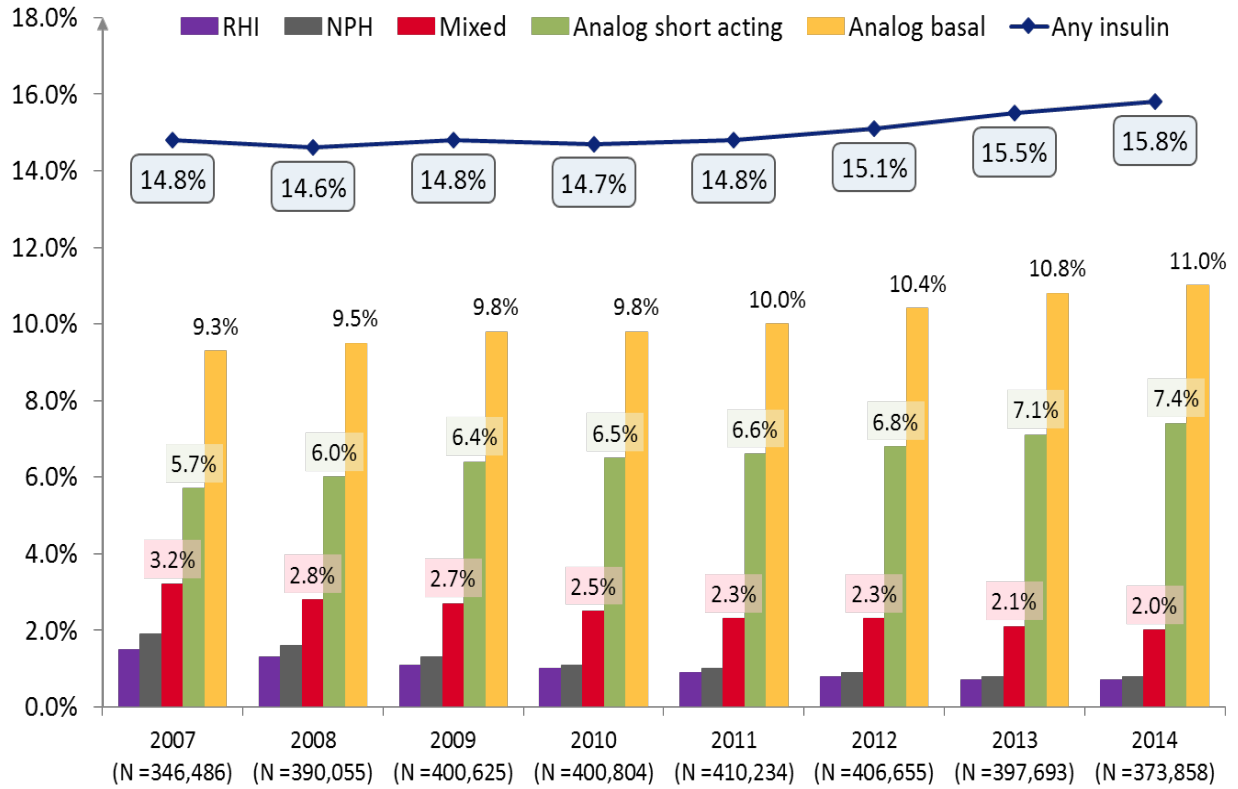

RHI: Regular Human Insulin; NPH: Neutral Protamine Hagedorn; T2DM: type 2 diabetes mellitus.
